# Supplementary material
Source: PubMed Central journal article supplement (PMC2638703)
Supplement: msn120_1.pdf [file msn120_1.pdf]

## Supplementary Material

Table S1: Primer pairs used to screen for remnants of the *mcy* gene cluster

Fig. S1: Sequence alignment showing the sequences at the 5' end of the *mcy* gene cluster found in 25 non-toxic strains that had lost the *mcy* gene cluster

Fig. S2: Sequence alignment showing the sequence break point at the 3' end in 25 non-toxic strains that had lost the *mcy* gene cluster

**Table S1:** Oligonucleotides used to screen the non-toxic strains for remnants of the *mcy* gene cluster. Primers have been named according to the nucleotide position of the *mcy* gene cluster (AJ441056) (Christiansen *et al.*, 2003)

| Forward Primers |                               | Reverse primers |                                      |       |
|-----------------|-------------------------------|-----------------|--------------------------------------|-------|
| Pos.            | Sequence (5'-3')              | Tm °C           | Pos. Sequence(5'-3')                 | Tm °C |
| 2               | CAAGCGCGCCGCA                 | 46              | 2 TCGCTATTGATCATTGATCAGGG            | 60    |
| 474             | AATAGCGATTTTCCCAAGCATTC       | 57              | 474 TGGTCACAGTATGGGCGGAT             | 60    |
| 925             | ATCCGCCATACTGTGACCA           | 59              | 925 TTCTTTAGGTCGTTAGGCTCCATT         | 58    |
| 1399            | AATGGAGCCTAACGACCTAAAGAA      | 59              | 1399 AAAACACCTGTCTTGCCGATTC          | 59    |
| 1851            | GAATCGGCAAGACAGGTGTTTT        | 58              | 1851 TCATTATTAAGTGTCTGTTCCCTCGAA     | 58    |
| 2308            | AGGAACAGCAGTTAATAATGATGGC     | 59              | 2308 TTGGTTCCCGATGCTCCA              | 60    |
| 2761            | TGGAGCATCGGGAACCAAT           | 60              | 2761 TTTAAGTGTCTTTGAAATAGGCGA        | 58    |
| 3208            | TCGCCTATTTCAAAGCACTTAAA       | 58              | 3208 AATTTCTAGGAAGATTTGATACCCCA      | 58    |
| 3668            | GGGTATCAAATCTTCTTAGAAATTGGA   | 60              | 3668 TTGTGTAGCAGCCAAAGCCA            | 59    |
| 4122            | TGGCTTTGGCTGCTACACAA          | 59              | 4122 AGTTACCGATGATTCTTGCTTGAA        | 58    |
| 4571            | TTCAAGCAAGAATCATCGGTAACCT     | 58              | 4571 TTGACCTAATTTGGGTTGCCA           | 59    |
| 5021            | TGGCAACCCAAATTAGGTCAA         | 59              | 5021 AGTAGTGGCTCCTGTTCCGC            | 58    |
| 5472            | GCGGAACAGGAGCCACTACT          | 58              | 5472 GGGTTGGCTGGGTTCAATAAT           | 59    |
| 5927            | ATTATTGAACCCAGCCAACCC         | 58              | 5927 TCCTAATAGAGAAGATTGGGCGG         | 60    |
| 6378            | CCGCCAATCTTCTCTATTAGGA        | 60              | 6378 CCGGATATTCTGAACGGCA             | 58    |
| 6830            | TGCCGTTTCCAGAAATATCCGG        | 58              | 6830 AAGGAAAACGTTGCCAGTCAAT          | 59    |
| 7280            | ATTGACTGGCAACGTTTTCTTAA       | 59              | 7280 TCGGATCTTCTTCTATTTGTGGTTT       | 58    |
| 7733            | AAACCACAAATAGAAGAAGATCCGA     | 58              | 7733 AAGCCGACCGGAAACTACT             | 59    |
| 8192            | AGTGTAGTTTCCGGTCGGCTT         | 59              | 8192 CGGTACCATGAGCTTCGATATAATCT      | 60    |
| 8650            | AGATTATATCGAAGCTCATGGTACCG    | 60              | 8650 TGCCAGACCCATTCAAAGC             | 58    |
| 9125            | GCTTTGAATGGGTCTGGCA           | 58              | 9125 CGCCAATACTATGTCCTAAAAGTGC       | 59    |
| 9576            | CACTTTTAGGACATAGTATTGGCGAAT   | 59              | 9576 CGTACTCCTAAGATGATTAACCCAATAA    | 58    |
| 10036           | GGTTAATCATCTTAGGAGTACGGTGC    | 59              | 10036AATCCTGTGCTGCGTGGAAATAAAACT     | 58    |
| 10498           | AGTTTTATTTCCAGCGACAGGATT      | 58              | 10498AAAGGACAGGATGAAAACAATAACG       | 59    |
| 10952           | CGTTATTGTTTTATCCTGTCTTT       | 59              | 10952AGAGTAGCATTGATAGTTGTTACCAATTTT  | 59    |
| 11408           | GAAATTGGTAACAACATCAATGCTACTCT | 59              | 11408ACAGTTTCCCTGACGTAAGCC           | 58    |
| 11857           | GGCTTTACGTCAGGGAAACTGT        | 58              | 11857GGGCGAGTATAGTGATCTAATAATAAAGTTC | 59    |
| 12316           | ATTAGATCACTATACTCGCCCCCTATC   | 59              | 12316ACCCAGTAACTTCGCGTAATATCTGT      | 59    |
| 12790           | ACAGATATTACGCGAAGTTACTGGG     | 59              | 12790CTAATTCGGTAATACGAGCCTGC         | 58    |
| 13240           | GCAGGCTCGTATTACCGAATTAG       | 58              | 13240TCCTGTGCCAAAAAAGAGTCA           | 58    |
| 13693           | TGACTCTTTTTTTTGGCACAGGA       | 58              | 13693TTCTAGCATCGGCAATGGC             | 58    |
| 14147           | GCCATTGCCGATGCTAGAA           | 58              | 14147GCGGTTTTTGTATGAGCAGAAAT         | 58    |
| 14603           | ATTTCTGCTCATAACAAAACCGC       | 58              | 14603GCAACGGCATATTCTAGGGC            | 58    |
| 15056           | GCCCTAGAATATGCCGTTGCTA        | 59              | 15056TCCGTCAATTCCTGAAAAGTAACAG       | 58    |
| 15512           | CTGTTACTTTTTCAGGAATTGACGGA    | 58              | 15512GATTTTCGAGTTGATGTTTTTGCAT       | 58    |
| 15978           | AACATCAACTCGAAATCCGCC         | 60              | 15978CGAGTAACTAAAACCTGATATTTGGG      | 59    |
| 16432           | CCAAAATATCAGGTTTTAGTTACTCGT   | 59              | 16432AAAAATGGAGATAATTCGCTAAAAGAAT    | 58    |
| 16884           | ATTCTTTTAGCGAATTATCTCCATTTTT  | 58              | 16884ATATTTTTCAGCAGCAGCACAAGC        | 58    |
| 17338           | TGCTGCTGCTGAAATATTACCG        | 59              | 17338TCCGAAAGTCAATGGTGGGT            | 59    |
| 17797           | ACCCACCATGACTTTTCGGA          | 58              | 17797TCAAACAATTACATCTTCAACCATTTC     | 59    |
| 18246           | GAATGGTTGAAGATGTAATTGTTTTGA   | 58              | 18246GAATGGTTGGACTTTGTTCTTTAAGATA    | 58    |
| 18707           | CTTAAAGAACAAGTCCAACCATTCA     | 59              | 18707TGCTAATAACCAAAGCTGACGCT         | 59    |
| 19155           | AGCGTCAGCTTTGGTTATTAGCA       | 59              | 19155CTGCATTGGGAATTCTAAAGGG          | 59    |

|                                       |    |                                       |    |
|---------------------------------------|----|---------------------------------------|----|
| 19616 TTAGAATTCCCAATGCAGTTTCG         | 59 | 19616 TTGATGTCTAAAAGCAGCGATGA         | 59 |
| 20070 TCATCGCTGCTTTTAGACATCAA         | 59 | 20070 GGGCATTGGGAGTCGAGTTA            | 59 |
| 20527 TAACTCGACTCCCAATGCC             | 59 | 20527 AGAGAGATGACGACCCATGACTC         | 58 |
| 20976 GAGTCATGGGTCGTCATCTCTCT         | 58 | 20976 GGTTATTATGGAAAACCTTGACCTAGGG    | 59 |
| 21438 CCCTAGGTCAAGTTTTCCATAATAACC     | 59 | 21438 ATAAAGTAACTAGGAATCATGTAAACTGGC  | 58 |
| 21880 GCCAGTTTACATGATTCCTAGTTACTTTAT  | 58 | 21880 CATTCCATAGGCATTATGATTTTGA       | 58 |
| 22341 ATAATGCCTATGGAATGCCAG           | 59 | 22341 TTGCCAGTCAGTATAATCTTTATAGTGAATT | 58 |
| 22786 AATTCACTATAAAGATTATACTGACTGGCAA | 58 | 22786 AAAGGATATTCTTGATTTTCATAAGCCT    | 58 |
| 23161 AGTCCTGCGGGATCAAATTAGA          | 59 | 23161 AAAATCTTCAGCGAATAAGTCGCT        | 59 |
| 23612 AGCGACTTATTCGCTGAAGATTTTAA      | 60 | 23612 AAGCCCATCTAAAATATTGAGAGCA       | 58 |
| 24003 CCCTATATTGAAAATGATGTAACCG       | 59 | 24003 TGCCAGAAGTAAATAGTAATAAGGCTTGA   | 60 |
| 24458 TCAAGCCTTATTACTATTTACTTCTGGCA   | 60 | 24458 AATGCTGGTTAATGGCTCTATCTG        | 59 |
| 24911 AGATAGAGCCATTAAACCAGCATTTG      | 60 | 24911 AATAAGTCAGTCTCTTGGATTTGATCAA    | 59 |
| 25341 GCATTCGCCCTCTTTGATCA            | 60 | 25341 CAGCTATAGGTAAGTACGATTAAAAAGTTT  | 59 |
| 25761 CGAGTACACAACCAACTAGAAAAACTTT    | 59 | 25761 ACATTCCCAACTCGATTGTAGGA         | 59 |
| 26209 TCCTACAATCGAGTTGGGAATGT         | 59 | 26209 AAAATAGTTCCTTGGGCTTGAGAA        | 58 |
| 26641 ATTGTCGTGCCTTTGATTCTCA          | 58 | 26641 GAGGATTGGGATTTTGGAAATG          | 58 |
| 27090 CATTTCCAAAATCCCAATCCTC          | 58 | 27090 GGCGGTTGCTTTTCATCAA             | 58 |
| 27544 TTGATGAAAAGCAACCGCC             | 58 | 27544 ATCCCTGATTTTGGCACTGTT           | 58 |
| 27994 AACAGTGCCAAAATCAGGGAA           | 58 | 27994 AAAATCCTGAGCGCAAACCTG           | 58 |
| 28444 CAAGTTTGCCTCAGGATTTT            | 58 | 28444 AGAACTCCTGTTAATGATGCGAA         | 58 |
| 28917 TTCGCATCATTAACAGGAGTTTCTT       | 59 | 28917 AGAGATACTCAGGTTGAGAACTTTTGC     | 59 |
| 29361 GCAAAAGTTCTCAACCTGAGTATCTCT     | 59 | 29361 TGATCATCGCTAAAACGCCAC           | 60 |
| 29813 GTGGCGTTT TAGCGATGATCA          | 60 | 29813 TTTGAATAGCTTGGAGAAGATTTAACAA    | 59 |
| 30292 TTCTCCAAGCTATTCAAAAAATCCC       | 60 | 30292 AGATTTTCCATGATTTTGGCAA          | 59 |
| 30766 CCAAAATCATGGAAAATCTCAGG         | 58 | 30766 TCATACCAATCTGTTAAGCCAATCT       | 58 |
| 31220 AGATTGGCTTAAACAGATTGGTATGA      | 58 | 31220 TAAAACCTGCTGAATCAGATAATCAAC     | 58 |
| 31691 TCAGCAGGTTTTAGGTTGGCA           | 59 | 31691 CCTGAATAATAACATCGACTAAATAGCG    | 59 |
| 32126 TTGTTAATCGCTATTTAGTCGATGTTATT   | 58 | 32126 GCCGTAAGCATAGTTAGCTTTAGATTC     | 58 |
| 32587 GAATCTAAAGCTAACTATGCTTACGGC     | 58 | 32587 TTGTAGGGTAACATCCTCAAAGTAATATG   | 59 |
| 33028 CATATTACTTTTGAGGATGTTACCCTACA   | 58 | 33028 TCCAAAGCACTGGTGGCTTC            | 60 |
| 33487 GAAGCCACCAGTGCTTTGGA            | 60 | 33487 TGAATAGCTGCTAGGTATAAAGCTAACTTG  | 59 |
| 33934 CAAGTTAGCTTTATACCTAGCAGCTATTCA  | 59 | 33934 TCTCAACTCCACATCGGGATT           | 58 |
| 34405 GTTGAGAGAAATAGATATCCTTACCCCTG   | 60 | 34405 TTGCAATGAGATCCCAATCACTA         | 58 |
| 34830 CGGCTAATCTAGCTAAAATTATCTGCTT    | 59 | 34830 AAGCCTCGCCACTACAAATCAC          | 59 |
| 35285 ATTTGTAGTGGCGAGGCTTTACC         | 60 | 35285 AGAATAGTTTCAATTTTCGCCCAAT       | 58 |
| 35749 ATTGGGCGAAATTGAAACTATTCT        | 58 | 35749 CCCCTAAGTGATGCCGAATC            | 58 |
| 36200 TTGATTCGGCATCACTTAGGG           | 59 | 36200 AACGACGTTATAGCGGAATTGG          | 59 |
| 36649 CCAATTCGGCTATAACGTCGTT          | 59 | 36649 TTTAATTGAGGTTGGAGCGGAT          | 59 |
| 37102 GCTCCAACCTCAATTAACCGT           | 58 | 37102 TGGGCCGCAGAAATTAGACT            | 58 |
| 37553 AGTCTAATTTCTGCGGCCA             | 58 | 37553 CACTCCAACCATCTAAAATAGAGTGG      | 58 |
| 38008 CCACTCTATTTTAGATGGTTGGAGTG      | 58 | 38008 AACCGCAGAGGCAAAGTATTG           | 58 |
| 38467 CAATACTTTGCCTCTGCGGTT           | 58 | 38467 TTTGAGTACGATTCCAGTCCCA          | 58 |
| 38921 TGGGACTGGAATCGTACTCAA           | 58 | 38921 CCGAGTTAGAGGAAGTACTGACT         | 58 |
| 39374 AGTCAAGTCAGTTCCTCTAACTCGG       | 58 | 39374 CAACTGAAGGTGGAATAGGAAGTGT       | 59 |
| 39828 AACTTCTATTCCACCTTCAGTTG         | 59 | 39828 ACGTAAGCCACTAATTTTGCCC          | 58 |
| 40278 GGGCAA AATTAGTGGCTTACGT         | 58 | 40278 CCTGGTGGGTTAAAGTCTAGAGA         | 59 |
| 40746 CCCACCAGGTTT TAGTCACG           | 59 | 40746 CATAAGTCTTCCAGTAAAACCTCCAGG     | 60 |
| 41190 CCTGGAGAGTTTTACTGGAAGACTTATG    | 60 | 41190 CACGGGAAAAGACTGGTAAACC          | 60 |
| 41664 CCGTGATTCTCCAACCTGCCT           | 59 | 41664 TTGATTTAAGTTGGCAACGGG           | 59 |
| 42126 CCGTTGCCAACTTAAATCAACAG         | 60 | 42126 TGTATTAATGGCAACGCATCAA          | 59 |
| 42578 TCCTTTGATGCGTTGCCA              | 58 | 42578 CGAAACGGTAATGCCAAAGAG           | 58 |
| 43041 CTCTTTGGCATTACCGTTTTCG          | 58 | 43041 GCTGAGGATTCTGGGCGAT             | 59 |
| 43500 ATCGCCAGAATCCTCAGC              | 59 | 43500 ACAGAATGATTCTATCTTCAAGGTGTCT    | 58 |

---

|                                      |    |                                     |    |
|--------------------------------------|----|-------------------------------------|----|
| 43961 CACCTTGAAGATAGAATCATTCTGTTTAGA | 60 | 43961AAGAGCTTCACCTCCACAAAAAA        | 58 |
| 44412 GTTTTTTGTGGAGGTGAAGCTCTT       | 59 | 44412GGGATGGCTGTCTAGAATTGTCTG       | 60 |
| 44854 AAATTCAGACAATTCTAGACAGCCATC    | 59 | 44854GGTGGGAAAAGACTTGTTAATAGCA      | 60 |
| 45305 TAAACAAGTCTTTTCCCACCCC         | 58 | 45305TAGCTCTGAGGTGATAATTGATAAAGAGAA | 59 |
| 45758 TTCTCTTATCAATTATCACCTCAGAGC    | 59 | 45758TGTACCAATACTAATATCTTGCTGACCAC  | 59 |
| 46201 GTGGTCAGCAAGATATTAGTATTGGTACA  | 59 | 46201TGGCTAACATTGCTGTCAACAATT       | 60 |
| 46684 ATCCAGAGCAACCCATCGG            | 59 | 46684GGTTTTGCTAATACTAATAATCGAGGTTT  | 58 |
| 47127 AAACCTCGATTATTAGTATTAGCAAAACC  | 58 | 47127AAAAATAGACGCATTACCGATGGT       | 59 |
| 47559 AACTTACTGCATACCGTACCATCG       | 58 | 47559GGAGCAATCGTCCCAAGTCTC          | 60 |
| 48016 GAGACTTGGGACGATTGCTCC          | 60 | 48016TGCCTCCGAGTTCAAAAAATG          | 59 |
| 48475 CATTTTTTGAAGTCGGAGGCA          | 59 | 48475AATATTTCCAGCTATACTGGCAAAAAGT   | 58 |
| 48917 TTGCGGACTACTTTTGCCAGT          | 59 | 48917GGGAAGTCGGTGGGTAAGTTC          | 58 |
| 49372 GAACTTACCCACCGACTTCCC          | 58 | 49372TCAGGAATTTCCATCACTGTTTTG       | 59 |
| 49840 GGAAATTCCTGAAATTGAACATCA       | 58 | 49840TCAATAAAAATTCCCACCAATACTTCT    | 58 |
| 50243 AACCAATTAGCCCATTATCTACAAGAA    | 59 | 50243CCCAGACTGAAGGATCAAAACTAAA      | 59 |
| 50716 TAGTTTTGATCCTTCAGTCTGGGAA      | 59 | 50716GCTAAAGGCACACCCCAA             | 60 |
| 51148 CGTTGCTGGAGAACTACATATTGG       | 59 | 51148TGATCTTTGATCGGGTTTTGG          | 58 |
| 51608 CCAAAACCCGATCAAAGATCA          | 58 | 51608TGATCGATTAATTCTGCATATTGTTCTA   | 58 |
| 51990 TGGCTGATTATTTAACGGATTATACTATCT | 58 | 51990GCTTGTATCCAATCATCTTCAACATC     | 59 |
| 52442 GATGTTGAAGATGATTGGATAACAAGC    | 59 | 52442GTAGTTTCTTCTTTCCAATAGCCAAAA    | 59 |
| 52889 TTGGCTATTGGAAAGAAGAACTACTT     | 58 | 52889AAGTATGCCGATCATATTGATTAACAA    | 58 |
| 53363 TTGTTAATCAATATGATCGGCATACTT    | 58 | 53363TGCGCCACAATTTGTCA              | 59 |
| 53843 TGACAAATTGTGGGCGCA             | 59 | 53843TAGCTTTGTTTCGATTTATATATTACCCC  | 59 |
| 54308 AAGCTACTATAAACTTTTTGACCAGGCA   | 60 | 54308AAAAATCATCAGGTTCTTTATCACCAT    | 58 |
| 54763 AAATAAATGGTGATAAAGAACCTGATGA   | 58 | 54763CCCCCTGAATTTTTACCGGA           | 60 |
| 55211 TGA CTCCGGTAAAAATTCAGGG        | 59 | 55211GCAAATCTTCCTGCTCCGAG           | 59 |

---

## Supplementary figure legends

FIG. S1: Sequence alignment showing the 5' end flanking regions of *mcyT* found in 24 non-toxic strains (deletion types I-III). The functional *mcy* sequence is marked in bold, the translation stop site of *mcyT* is underlined (Pos. 449 of the *mcy* gene cluster of the toxic strain CYA126/8, AJ441056). One strain No252 (deletion type IV) did not contain *mcyT* but contained the same flanking region of the *mcy* gene cluster as the toxic strain directly linked to the remnant of the insertion element (see also Fig. 3). The stop translational site of *mcyT* (Pos. 449, AJ441056) is marked in bold and underlined.

FIG. S2: Sequence alignment showing the sequence break point at the 3' end of *mcyT* found in 24 non-toxic strains (deletion types I-III). For comparison the corresponding bi-directional promoter region located between the genes *mcyT* and *mcyD* of the *mcy* gene cluster sequence of the toxic strain CYA126/8 is shown in bold. The translation initiation site of *mcyT* (Pos. 1240, AJ441056) is marked in bold and underlined. The inverse repeats of the remnants of the transposable element that lead to the deletion of the *mcy* gene cluster are underlined. One strain No252 did not contain *mcyT* (deletion type IV) but contained the same remnant of an insertion element as well as the 3' end flanking region of the *mcy* gene cluster (1,406 bp downstream of *mcyJ* underlined).
